# Supplementary material for: Poly-l-lysine-coated PLGA/poly(amino acid)-modified hydroxyapatite porous scaffolds as efficient tissue engineering scaffolds for cell adhesion, proliferation, and differentiation
Source: Royal Society of Chemistry journal article supplement (doi:10.1039/c9nj01675a), 2019-01-01
Supplement: c9nj01675a1.pdf [file c9nj01675a1.pdf]

1 **Support information for**

2 **Poly-L-lysine Coated PLGA/Poly (amino Acid)**

3 **Modified Hydroxyapatite Porous Scaffolds as Efficient Tissue**

4 **Engineering Scaffolds for Cell Adhesion, Proliferation, and**

5 **Differentiation**

6 Shuang Zheng<sup>1</sup>, Yonghong Guan<sup>1</sup>, Haichi Yu<sup>1</sup>, Ge Huang<sup>1</sup>, Changjun Zheng<sup>1\*</sup>

7 <sup>1</sup> Department of Orthopedic Surgery, the Second Hospital of Jilin University, Ziqiang

8 Street No. 218, Changchun TX: 130041, PR China

9 Current Address: Department of Orthopedic Surgery, the Second Hospital of Jilin

10 University, Ziqiang Street No. 218, Changchun TX: 130041, PR China

11 \*Corresponding Author

12 E-mail: zhengchangjun9616@126.com (ZCJ);

# 1 Supplementary Figures

2 **Fig. S1** FT-IR spectra (A), XRD patterns (B), and TGA curves (C) of HA and PBLG-  
 3 g-HA.

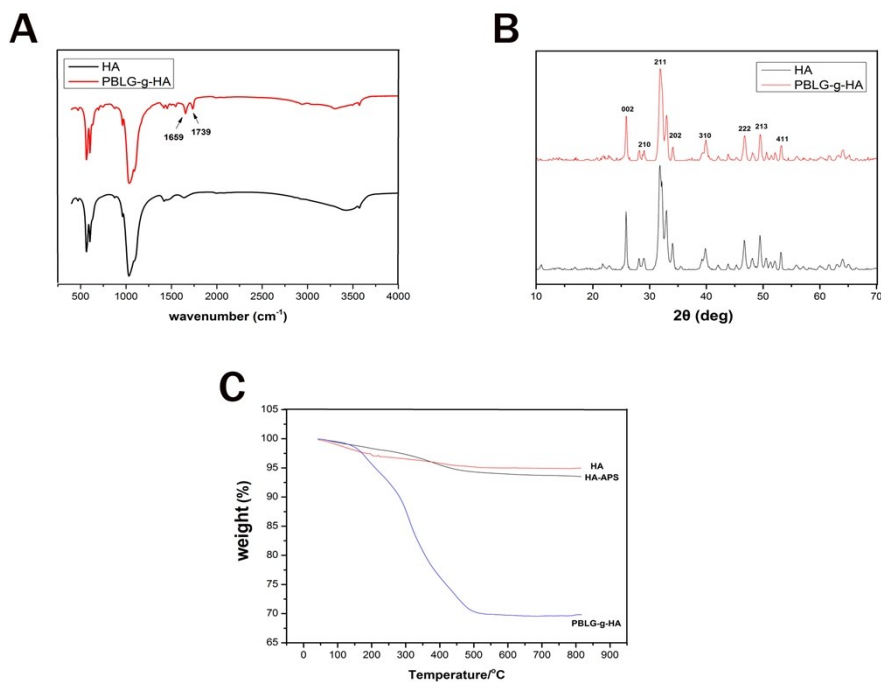

4  
 5 **Fig. S2** EDX spectra (A) and element contents (B) of PLGA/HA and PLGA/PBLG-g-  
 6 HA porous scaffolds.

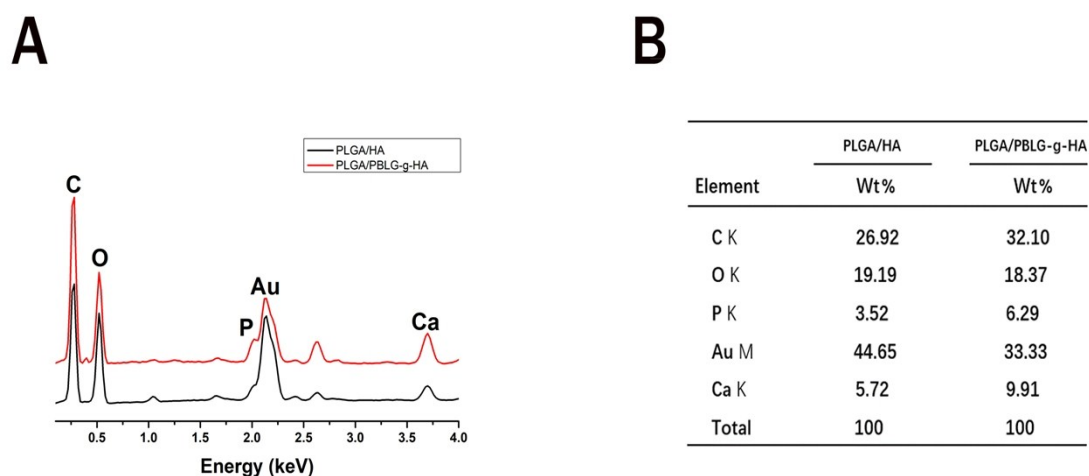

7

## 1 **Supplementary Methods**

### 2 **Characterization of HA and PBLG-g-HA**

3 Fourier-transform infrared spectroscopy (FT-IR, Bio-Rad Win-IR Spectrometer,  
4 Watford, UK), X-ray diffraction (XRD, D8 ADVANCE, Germany) and thermal  
5 gravimetric analysis (TGA) (TA Instruments TGA500, USA) were used to examine  
6 the amount of surface grafted PBLG, chemical properties and crystalline structure of  
7 HA and PBLG-g-HA.

### 8 **EDX spectra and element contents of PLGA/HA and PLGA/PBLG-g-HA porous** 9 **scaffolds**

10 The scaffolds were fractured after snap-freezing, sputter-coated with gold, and  
11 observed at an accelerating voltage of 15 kV. For characterizing the distribution and  
12 exposure degrees of PBLG-g-HA and HA in PLGA matrix, it was analyzed with  
13 energy dispersive X-ray spectrometry (EDX) (XL-30W/TMP, Philips, Amsterdam,  
14 The Netherlands).
